# Supplementary material
Source: PubMed Central journal article supplement (PMC9174046)
Supplement: mmc1.pdf [file mmc1.pdf]

**Supplementary Table 1:** The HD-related data and laboratory analyses at first and third months after diagnosing COVID-19 data. All data in the non-COVID group were obtained at the same month with the COVID-19 patient in the non-COVID group.

|                                                                        |                                               | <b>COVID-19 Group<br/>N: 636</b> | <b>Non-COVID Group<br/>N: 587</b> | <b>Total<br/>N: 1223</b> |
|------------------------------------------------------------------------|-----------------------------------------------|----------------------------------|-----------------------------------|--------------------------|
| <b>HD-related information (before Covid-19)</b>                        |                                               |                                  |                                   |                          |
| HD duration (month), median (IQR)                                      |                                               | 48(24-96)                        | 53(24-96)                         | 48(24-96)                |
| Vascular access, n(%)                                                  | A-V fistula                                   | 488(76.9)                        | 487(82.8)                         | 975(79.7) *              |
|                                                                        | A-V graft                                     | 11(1.7)                          | 9(1.5)                            | 20(1.6)                  |
|                                                                        | Non-tunneled catheter                         | 7(1.1)                           | 3(0.5)                            | 10(0.8)                  |
|                                                                        | Tunneled-permanent catheter                   | 129(20.3)                        | 89(15.1)                          | 218(17.8) *              |
| The duration of use of this last vascular access (month), median (IQR) |                                               | 36(15-62)                        | 36(16-72)                         | 36(16-71)                |
| Previous vascular access procedures, n(%)                              | A-V fistula or graft created 1-2 times        | 198(31.2)                        | 175(29.8)                         | 373(30.5)                |
|                                                                        | Three and more A-V fistulas or grafts created | 34(5.4)                          | 25(4.3)                           | 59(4.8)                  |
|                                                                        | Using the first vascular access               | 327(51.5)                        | 332(56.5)                         | 659(53.9)                |
|                                                                        | Never been created. Using an HD catheter.     | 76(12.0)                         | 56(9.5)                           | 132(10.8)                |
| Predialysis weight (kg), median (IQR)                                  |                                               | 71(62-81)                        | 69(60-80)                         | 70(60-80)                |
| Residual urine volume (ml/day), median (IQR)                           |                                               | 0(0-0)                           | 0(0-100)                          | 0(0-0)                   |
| Predialysis systolic blood pressure (mmHg), median (IQR)               |                                               | 130(120-145)                     | 130(120-140)                      | 130(120-140)             |
| Predialysis diastolic blood pressure (mmHg), median (IQR)              |                                               | 80(70-83)                        | 80(70-80)                         | 80(70-80)                |
| HD duration (min/session), median (IQR)                                |                                               | 240(240-240)                     | 240(240-240)                      | 240(240-240)             |
| UF volume (L/session), median (IQR)                                    |                                               | 3(2-4)                           | 2.95(2-4)                         | 3(2-4)                   |
| Ven Pressure (mm/H2O), median (IQR)                                    |                                               | 135(100-160)                     | 130(110-160)                      | 134(100-160)             |
| Pump speed (ml/min), median (IQR)                                      |                                               | 300(300-350)                     | 300(300-350)                      | 300(300-350)             |
| Kt/V, median (IQR)                                                     |                                               | 1.56(1.40-1.75)                  | 1.60(1.40-1.80)                   | 1.6(1.40-1.80)*          |
| Urea reduction rate, median (IQR)                                      |                                               | 72(68-77)                        | 74(68-78)                         | 73(68-78)                |
| Dialyzer surface area (m2), median (IQR)                               |                                               | 1.7(1.6-1.8)                     | 1.8(1.7-1.8)                      | 1.7(1.6-1.8)*            |

|                                                            |                               |                 |                 |                  |
|------------------------------------------------------------|-------------------------------|-----------------|-----------------|------------------|
| Weekly ESA amount (U/kg), median (IQR)                     |                               | 88(0-150)       | 80(0-150)       | 83.75(0-150)     |
| Anticoagulation, median (IQR)                              | Anticoagulation-free dialysis | 15(2.4)         | 11(1.9)         | 26(2.1)          |
|                                                            | Standard heparin              | 381(60.0)       | 406(69.1)       | 787(64.4)*       |
|                                                            | Low molecular weight heparin  | 237(37.3)       | 170(28.9)       | 407(33.3)*       |
|                                                            | Other                         | 2(0.3)          | 1(0.2)          | 3(0.2)           |
| <b><u>28th Day Data (After Covid-19), median (IQR)</u></b> |                               |                 |                 |                  |
| Predialysis weight (kg)                                    |                               | 70(63-81)       | 68.5(59-80)     | 70(61-80)        |
| Predialysis systolic blood pressure (mmHg)                 |                               | 130(120-146)    | 130(120-142)    | 130(120-145)     |
| Predialysis diastolic blood pressure (mmHg)                |                               | 80(70-80)       | 80(70-80)       | 80(70-80)        |
| HD Time (min/session)                                      |                               | 240(240-240)    | 240(240-240)    | 240(240-240)     |
| UF volume (L/session)                                      |                               | 3(2-4)          | 3(2-4)          | 3(2-4)           |
| Ven Pressure (mm/H2O)                                      |                               | 130(110-165)    | 135(110-160)    | 131.5(110-162)*  |
| Pump speed (ml/min)                                        |                               | 300(300-350)    | 300(300-350)    | 300(300-350)     |
| Kt/V                                                       |                               | 1.55(1-2)       | 1.6(1-2)        | 1.6(1-2)         |
| URR (%)                                                    |                               | 72(67-77)       | 73(67-78)       | 73(67-78)        |
| Residual urine (ml/day)                                    |                               | 0(0-0)          | 0(0-0)          | 0(0-0)           |
| Dialyzer surface area (m2)                                 |                               | 1.7(2-2)        | 1.8(2-2)        | 1.7(2-2)         |
| Weekly ESA amount (U/kg)                                   |                               | 120(0-150)      | 75(0-150)       | 100(0-150)*      |
| <b><u>28th Day Data (After Covid-19), median (IQR)</u></b> |                               |                 |                 |                  |
| Creatinine (mg/dl)                                         |                               | 7.1(6-9)        | 7.9(6-10)       | 7.5(6-9)*        |
| Potassium (mmol/L)                                         |                               | 4.9(4-5)        | 5.1(5-6)        | 5(5-6)*          |
| Calcium (mg/dl)                                            |                               | 8.5(8-9)        | 8.6(8-9)        | 8.6(8-9)*        |
| Phosphorus (mg/dl)                                         |                               | 4.8(4-6)        | 4.83(4-6)       | 4.8(4-6)         |
| Parathyroid hormone (pg/mL)                                |                               | 342(198-600)    | 365(207-659)    | 352(200-613)     |
| ALT (U/L)                                                  |                               | 12(8-18)        | 11(8-15)        | 12(8-17)*        |
| Album (g/dl)                                               |                               | 3.625(3-4)      | 3.8(4-4)        | 3.73(3-4)*       |
| Ferritin (ng/ml)                                           |                               | 651.5(357-1026) | 505(307-750)    | 566(328-876)*    |
| CRP (mg/l)                                                 |                               | 10.35(4-26)     | 3.4(2-12)       | 6.82(2-18)*      |
| Hemoglobin (g/dl)                                          |                               | 10.1(9-11)      | 11(10-12)       | 10.6(9-12)*      |
| Leukocyte(/mm3)                                            |                               | 6390(4960-7950) | 6200(4600-7800) | 6300(4815-7850)* |
| Number of neutrophils (/mm3)                               |                               | 3810(2612-5348) | 3910(2770-5040) | 3880(2700-5130)  |
| Number of lymphocytes (/mm3)                               |                               | 1140(730-1600)  | 1300(760-1800)  | 1220(730-1700)   |

| <b>90<sup>th</sup>-day Data</b> †           |                               | <b>N:616</b>      | <b>N:588</b>        | <b>N:1204</b>       |
|---------------------------------------------|-------------------------------|-------------------|---------------------|---------------------|
| Data regarding HD Procedure                 |                               |                   |                     |                     |
| Predialysis weight (kg)                     |                               | 70(61.8-81.0)     | 68.5(59.0-79.5)     | 70(60.0-80.0)       |
| Predialysis systolic blood pressure (mmHg)  |                               | 135(120-143)      | 130(120-140)        | 130(120-142)        |
| Predialysis diastolic blood pressure (mmHg) |                               | 80(70-82)         | 80(70-80)           | 80(70.0-80)         |
| HD Time (min/session)                       |                               | 240(240-240)      | 240(240-240)        | 240(240-240)        |
| UF volume (L/session)                       |                               | 3(2.0-3.5)        | 3(2.0-3.5)          | 3(2.0-3.5)          |
| Veous Pressure (mm/H2O)                     |                               | 140(116-170)      | 138(118-160)        | 139(118-166)        |
| Pump speed (ml/min)                         |                               | 300(300-350)      | 300(300-350)        | 300(300-350)        |
| Kt/V                                        |                               | 1.565(1.4-1.8)    | 1.6(1.4-1.8)        | 1.6(1.4-1.8)        |
| URR                                         |                               | 72(67.0-78.0)     | 74(68.0-78.0)       | 73(68.0-78.0)       |
| Residual urine (ml/day)                     |                               | 0(0.0-0)          | 0(0.0-0)            | 0(0.0-0)            |
| Dialyzer surface area (m2)                  |                               | 1.7(1.6-1.8)      | 1.8(1.7-1.8)        | 1.7(1.6-1.8)*       |
| ESA dosage (IU/week)                        |                               | 91(0.0-150.0)     | 75(0.0-150.0)       | 75(0.0-150.0)       |
| Anticoagulation application                 | Anticoagulation-free dialysis | 14(2.3)           | 12(2.0)             | 26(2.2)             |
|                                             | Standard heparin              | 367(59.6)         | 417(70.9)           | 784(65.1)*          |
|                                             | Low molecular weight heparin  | 231(37.5)         | 157(26.7)           | 388(32.2)*          |
|                                             | Other anticoagulants          | 4(0.6)            | 2(0.3)              | 6(0.5)              |
| Predialysis Lab Analyses                    |                               |                   |                     |                     |
| Creatinine (mg/dl)                          |                               | 7.2(5.8-8.8)      | 7.9(6.3-9.5)        | 7.5(6.0-9.2)        |
| Potassium (mmol/L)                          |                               | 5(4.6-5.5)        | 5(4.6-5.6)          | 5(4.6-5.5)          |
| Calcium (mg/dl)                             |                               | 8.7(8.1-9.2)      | 8.655(8.1-9.1)      | 8.7(8.1-9.1)        |
| Phosphorus (mg/dl)                          |                               | 5(4.0-5.9)        | 4.97(4.0-5.9)       | 5(4.0-5.9)          |
| Parathormone (pg/mL)                        |                               | 324(177-564)      | 388(215.0-651)      | 354(196-600)*       |
| ALT (U/L)                                   |                               | 11(8.0-17.0)      | 10(7.6-15.0)        | 11(8.0-16.0)        |
| Albumin (g/dl)                              |                               | 3.8(3.5-4.0)      | 3.8(3.6-4.0)        | 3.8(3.6-4.0)        |
| Ferritin (ng/ml)                            |                               | 526(280-888)      | 476(292-762)        | 500(288-804)*       |
| CRP (mg/l)                                  |                               | 7(3.0-16.0)       | 4(1.8-11.9)         | 5.14(2.0-13.5)*     |
| Hemoglobin (g/dl)                           |                               | 11(10.1-12.0)     | 11.2(10.2-12.0)     | 11.1(10.1-12.0)     |
| Leukocyte(/mm3)                             |                               | 6405(5055-8017)   | 6335(4840-7715)     | 6400(4980-7890)*    |
| Neutrophils (/mm3)                          |                               | 3800(2740.0-5110) | 3900(2790.0-4950.0) | 3835(2769.0-5010.0) |
| Lymphocytes (/mm3)                          |                               | 1293(860-1800)    | 1310(800-1800)      | 1300(830-1800)      |

Abbreviations: HD: hemodialysis , A-V: Arteriovenous, UF: Ultrafiltration, URR: Urea reduction ratio, ESA: Erythropoiesis stimulating agents, ALT: Alanine Aminotransferase, CRP: C reactive protein, ADPKD: Autosomal dominant polycystic kidney.

\*p<0.05

**Supplementary Table 2:** Characteristics of survivor and non-survivor patients on the 90<sup>th</sup> day and differences between the groups.

|                                      |     | <b>Non-survivor<br/>N:38 (3.1%)</b> | <b>Survivor<br/>N:1185 (96.9%)</b> | <b>Total<br/>N:1223</b> |
|--------------------------------------|-----|-------------------------------------|------------------------------------|-------------------------|
| <b>Comorbidities</b>                 |     |                                     |                                    |                         |
| Diabetes mellitus                    |     | 19(4.0)                             | 453(96.0)                          | 472(100)                |
| Hypertension                         |     | 30(3.2)                             | 914(96.8)                          | 944(100)                |
| COPD                                 |     | 5(3.7)                              | 131(96.3)                          | 136(100)                |
| Cardiac disease                      |     | 17(3.6)                             | 450(96.4)                          | 467(100)                |
| Cerebrovascular disease              |     | 2(3.7)                              | 52(96.3)                           | 54(100)                 |
| Malignancy                           |     | 2(5.1)                              | 37(94.9)                           | 39(100)                 |
| Chronic liver disease                |     | 1(2.6)                              | 37(97.4)                           | 38(100)                 |
| Autoimmune/auto-inflammatory disease |     | 1(2.5)                              | 39(97.5)                           | 40(100)                 |
| A-V fistula thrombosis history       |     | 5(3.7)                              | 130(96.3)                          | 135(100)                |
| <b>Medications</b>                   |     |                                     |                                    |                         |
| ACE inhibitor                        | No  | 32(3.4)                             | 921(96.6)                          | 953(100)                |
|                                      | Yes | 5(2.2)                              | 224(97.8)                          | 229(100)                |
| ARB                                  | No  | 34(3.2)                             | 1040(96.8)                         | 1074(100)               |
|                                      | Yes | 3(2.8)                              | 104(97.2)                          | 107(100)                |
| Calcium channel blockers             | No  | 21(3.1)                             | 651(96.9)                          | 672(100)                |
|                                      | Yes | 16(3.1)                             | 497(96.9)                          | 513(100)                |
| Beta-blocker                         | No  | 20(3.0)                             | 648(97.0)                          | 668(100)                |
|                                      | Yes | 17(3.3)                             | 499(96.7)                          | 516(100)                |
| Other antihypertensives              | No  | 30(3.3)                             | 887(96.7)                          | 917(100)                |
|                                      | Yes | 6(2.3)                              | 252(97.7)                          | 258(100)                |
| Insulin                              | No  | 20(2.3)                             | 839(97.7)                          | 859(100)*               |
|                                      | Yes | 18(5.3)                             | 319(94.7)                          | 337(100)*               |
| Oral antidiabetic                    | No  | 35(3.2)                             | 1074(96.8)                         | 1109(100)               |
|                                      | Yes | 3(3.8)                              | 76(96.2)                           | 79(100)                 |
| Statins                              | No  | 30(3.1)                             | 933(96.9)                          | 963(100)                |
|                                      | Yes | 6(2.8)                              | 212(97.2)                          | 218(100)                |
| Antiaggregant                        | No  | 15(2.7)                             | 534(97.3)                          | 549(100)                |

|                                             |                               |             |            |           |
|---------------------------------------------|-------------------------------|-------------|------------|-----------|
|                                             | Yes                           | 21(3.4)     | 605(96.6)  | 626(100)  |
| Anticoagulant                               | No                            | 29(3.1)     | 894(96.9)  | 923(100)  |
|                                             | Yes                           | 7(2.7)      | 251(97.3)  | 258(100)  |
| ESA                                         | No                            | 7(2.4)      | 289(97.6)  | 296(100)  |
|                                             | Yes                           | 30(3.4)     | 858(96.6)  | 888(100)  |
| Iv iron                                     | No                            | 12(2.8)     | 417(97.2)  | 429(100)  |
|                                             | Yes                           | 25(3.3)     | 728(96.7)  | 753(100)  |
| Vitamin D or an analog                      | No                            | 17(3.3)     | 506(96.7)  | 523(100)  |
|                                             | Yes                           | 20(3.0)     | 644(97.0)  | 664(100)  |
| Calcium containing phosphorus binder        | No                            | 12(3.3)     | 348(96.7)  | 360(100)  |
|                                             | Yes                           | 24(2.9)     | 802(97.1)  | 826(100)  |
| Lanthanum                                   | No                            | 33(3.0)     | 1051(97.0) | 1084(100) |
|                                             | Yes                           | 2(2.7)      | 72(97.3)   | 74(100)   |
| Cinacalcet                                  | No                            | 27(2.7)     | 970(97.3)  | 997(100)  |
|                                             | Yes                           | 9(5.6)      | 152(94.4)  | 161(100)* |
| <b>Smoking status</b>                       | Never smoked                  | 16(2.4)     | 651(97.6)  | 667(100)  |
|                                             | Still smoking                 | 8(5.3)      | 142(94.7)  | 150(100)* |
|                                             | Quited smoking                | 9(2.6)      | 336(97.4)  | 345(100)  |
| <b>HD information</b>                       |                               |             |            |           |
| Vascular access                             | A-V fistula                   | 22(2.3)     | 953(97.7)  | 975(100)* |
|                                             | A-V graft                     | 1(5.0)      | 19(95.0)   | 20(100)   |
|                                             | Catheter (Transient)          | 0(0.0)      | 10(100)    | 10(100)   |
|                                             | Catheter (tunneled-permanent) | 15(6.9)     | 203(93.1)  | 218(100)* |
| Duration of current vascular access (month) |                               | 24.5(18-48) | 36(16-72)  | 36(16-71) |
| Number of sessions during active Covid-19   |                               | 6(4-10)     | 6(5-8)     | 6(5-8)    |
| <b>Symptoms</b>                             |                               |             |            |           |
| Fever                                       | No                            | 10(4.9)     | 193(95.1)  | 203(100)  |
|                                             | Yes                           | 24(5.8)     | 390(94.2)  | 414(100)  |
| Dyspnea                                     | No                            | 10(2.9)     | 340(97.1)  | 350(100)* |
|                                             | Yes                           | 24(9.0)     | 244(91.0)  | 268(100)* |
| Cough                                       | No                            | 7(3.1)      | 220(96.9)  | 227(100)* |
|                                             | Yes                           | 27(6.9)     | 364(93.1)  | 391(100)* |

|                                               |                                  |          |            |           |
|-----------------------------------------------|----------------------------------|----------|------------|-----------|
| Diarrhea                                      | No                               | 28(5.4)  | 489(94.6)  | 517(100)  |
|                                               | Yes                              | 4(4.5)   | 84(95.5)   | 88(100)   |
| Loss of smell                                 | No                               | 28(5.5)  | 477(94.5)  | 505(100)  |
|                                               | Yes                              | 4(4.2)   | 92(95.8)   | 96(100)   |
| Loss of taste                                 | No                               | 26(5.3)  | 461(94.7)  | 487(100)  |
|                                               | Yes                              | 6(5.4)   | 105(94.6)  | 111(100)  |
| Pneumonia on chest CT                         | No                               | 3(2.3)   | 130(97.7)  | 133(100)  |
|                                               | Yes                              | 27(6.3)  | 404(93.7)  | 431(100)  |
| Clinical Severity of Covid-19 at Presentation | Asymptomatic disease             | 4(5.1)   | 74(94.9)   | 78(100)   |
|                                               | Mild disease                     | 9(2.7)   | 327(97.3)  | 336(100)* |
|                                               | Moderate-to-severe disease       | 13(6.4)  | 189(93.6)  | 202(100)  |
|                                               | Serious-life threatening disease | 8(40.0)  | 12(60.0)   | 20(100)*  |
| <b>Treatments for COVID-19</b>                |                                  |          |            |           |
| Hydroxychloroquine                            | No                               | 20(4.4)  | 433(95.6)  | 453(100)  |
|                                               | Yes                              | 10(7.5)  | 124(92.5)  | 134(100)  |
| Oseltamivir                                   | No                               | 27(4.9)  | 523(95.1)  | 550(100)  |
|                                               | Yes                              | 3(9.1)   | 30(90.9)   | 33(100)   |
| Macrolid                                      | No                               | 22(4.8)  | 438(95.2)  | 460(100)  |
|                                               | Yes                              | 8(6.6)   | 113(93.4)  | 121(100)  |
| Favipiravir                                   | No                               | 1(1.9)   | 53(98.1)   | 54(100)   |
|                                               | Yes                              | 30(5.4)  | 530(94.6)  | 560(100)  |
| Glucocorticoid                                | No                               | 8(2.2)   | 361(97.8)  | 369(100)* |
|                                               | Yes                              | 24(11.0) | 194(89.0)  | 218(100)* |
| Lopinavir/ritonavir                           | No                               | 311(5.3) | 551(94.7)  | 582(100)  |
|                                               | Yes                              | 0(0.0)   | 1(100)     | 1(100)    |
| Tocilizumab                                   | No                               | 28(4.9)  | 547(95.1)  | 575(100)* |
|                                               | Yes                              | 2(25.0)  | 6(75.0)    | 8(100)*   |
| Anakinra                                      | No                               | 28(4.8)  | 553(95.2)  | 581(100)* |
|                                               | Yes                              | 3(60.0)  | 2(40.0)    | 5(100)*   |
| Canvalescent Plasma                           | No                               | 301(5.4) | 529(94.6)  | 559(100)  |
|                                               | Yes                              | 0(0.0)   | 25(100)    | 25(100)   |
| Apheresis/immunoabsorption applications       | No                               | 29(5.0)  | 5541(95.0) | 583(100)  |

|                                                               |                              |                |              |              |
|---------------------------------------------------------------|------------------------------|----------------|--------------|--------------|
|                                                               | Yes                          | 1(100)         | 0(0.0)       | 1(100)       |
| Dialysis performed place during the active period of Covid-19 | Another center or hospital   | 3(3.5)         | 82(96.5)     | 85(100)      |
|                                                               | Attending center or hospital | 29(5.4)        | 508(94.6)    | 537(100)     |
| <b>ICU admission</b>                                          |                              |                |              |              |
| Admission to ICU                                              | No                           | 17(4.3)        | 379(95.7)    | 396(100.0)*  |
|                                                               | Yes                          | 15(26.8)       | 41(73.2)     | 56(100.0)*   |
| Mechanical ventilation                                        | No                           | 1(3.2)         | 30(96.8)     | 31(100)*     |
|                                                               | Yes                          | 16(59.3)       | 11(40.7)     | 27(100)*     |
| ECMO application                                              | No                           | 141(29.2)      | 34(70.8)     | 48(100)      |
|                                                               | Yes                          | 0(0.0)         | 6(100)       | 6(100)       |
| Slow continuous treatments (HF/HDF)                           | No                           | 9(19.6)        | 37(80.4)     | 46(100)*     |
|                                                               | Yes                          | 6(66.7)        | 3(33.3)      | 9(100)*      |
| Total length of hospital stay (including service + ICU), days |                              | 13(8-20)       | 12(9-17)     | 12(8-18)     |
| Length of stay at ICU                                         |                              | 10(4-17)       | 8(6-14)      | 9(6-15)      |
| <b>28th day</b>                                               |                              |                |              |              |
| Height (cm)                                                   |                              | 163(157-174)   | 165(160-172) | 165(160-172) |
| Predialysis Weight (kg)                                       |                              | 73(63-85)      | 70(60-80)    | 70(60-80)    |
| Predialysis systolic blood pressure (mmHg)                    |                              | 137.5(120-150) | 130(120-140) | 130(120-140) |
| Predialysis diastolic blood pressure (mmHg)                   |                              | 80(70-80)      | 80(70-80)    | 80(70-80)    |
| HD Time (min/session)                                         |                              | 240(240-240)   | 240(240-240) | 240(240-240) |
| UF volume (L/session)                                         |                              | 3(2-3)         | 3(2-4)       | 3(2-4)       |
| Ven Pump Pressure (mm/H2O)                                    |                              | 125(100-165)   | 135(100-160) | 134(100-160) |
| Pump speed (ml/min)                                           |                              | 300(260-350)   | 300(300-350) | 300(300-350) |
| Kt/V                                                          |                              | 1.6(1-2)       | 1.6(1-2)     | 1.6(1-2)     |
| URR                                                           |                              | 71.5(65-78)    | 73(68-78)    | 73(68-78)    |
| Residual urine volume (ml/day)                                |                              | 0(0-0)         | 0(0-0)       | 0(0-0)       |
| Dialyzer surface area (m2)                                    |                              | 1.7(2-2)       | 1.7(2-2)     | 1.7(2-2)     |
| Weekly ESA dosage (IU/kg)                                     |                              | 100(56-150)    | 83(0-150)    | 83.75(0-150) |
| Creatinine (mg/dl)                                            |                              | 6.325(5-8)     | 7.62(6-9)    | 7.6(6-9)     |
| K (mmol/L)                                                    |                              | 5.1(5-6)       | 5(5-6)       | 5(5-6)       |



|                                             |  |                 |                 |                 |
|---------------------------------------------|--|-----------------|-----------------|-----------------|
| Ca (mg/L)                                   |  | 8.55(8-9)       | 8.6(8-9)        | 8.6(8-9)        |
| Phosphorus (mg/L)                           |  | 5.3(4-6)        | 5(4-6)          | 5(4-6)          |
| Parathormon (pg/mL)                         |  | 350(280-674)    | 360.5(205-645)  | 358(206-646)    |
| ALT (U/L)                                   |  | 11(8-19)        | 11(8-16)        | 11(8-16)        |
| Albumin (g/dl)                              |  | 3.7(3-4)        | 3.8(4-4)        | 3.8(4-4)*       |
| Ferritin (ng/ml)                            |  | 474(249-785)    | 514(290-813)    | 513(289-813)    |
| CRP (mg/l)                                  |  | 7.4(2-31)       | 5.9(2-15)       | 5.9(2-15)*      |
| Hemoglobin (g/dl)                           |  | 10.8(10-11)     | 11(10-12)       | 11(10-12)       |
| Leukocyte(/mm3)                             |  | 7000(4395-8270) | 6350(4930-7955) | 6355(4910-7985) |
| Neutrophils (/mm3)                          |  | 4150(2635-6315) | 3885(2600-5230) | 3885(2600-5240) |
| Lymphocytes (/mm3)                          |  | 1265(860-1600)  | 1300(760-1757)  | 1290(770-1752)  |
| <b>90th day</b>                             |  |                 |                 |                 |
| Height (cm)                                 |  | 165(157-175)    | 165(160-171)    | 165(160-172)    |
| Predialysi Weight (kg)                      |  | 69.5(58-85)     | 70(61-80)       | 70(61-80)       |
| Predialysis systolic blood pressure (mmHg)  |  | 130(120-150)    | 130(120-144)    | 130(120-145)    |
| Predialysis diastolic blood pressure (mmHg) |  | 80(70-90)       | 80(70-80)       | 80(70-80)       |
| HD Time (min/session)                       |  | 240(240-240)    | 240(240-240)    | 240(240-240)    |
| UF volume (L/session)                       |  | 2.9(2-3)        | 3(2-4)          | 3(2-4)          |
| Ven Pump Pressure (mm/H2O)                  |  | 120(100-180)    | 132(110-162)    | 131.5(110-162)  |
| Pump speed (ml/min)                         |  | 300(250-350)    | 300(300-350)    | 300(300-350)    |
| Kt/V                                        |  | 1.475(1-2)      | 1.6(1-2)        | 1.6(1-2)        |
| URR                                         |  | 70.5(65-80)     | 73(68-78)       | 73(67-78)       |
| Residual urine volume (ml/day)              |  | 0(0-0)          | 0(0-0)          | 0(0-0)          |
| Dialyzer surface area (m2)                  |  | 1.7(2-2)        | 1.7(2-2)        | 1.7(2-2)        |
| Weekly ESA dosage (IU/kg)                   |  | 120(75-150)     | 100(0-150)      | 100(0-150)      |
| Creatinine (mg/dl)                          |  | 6.54(4-8)       | 7.52(6-9)       | 7.5(6-9)        |
| Potassium (mmol/L)                          |  | 5.31(5-6)       | 5(5-6)          | 5(5-6)          |
| Calcium (mg/dl)                             |  | 8.47(8-9)       | 8.6(8-9)        | 8.6(8-9)        |
| Phosphorus (mg/dl)                          |  | 5.46(4-6)       | 4.8(4-6)        | 4.8(4-6)        |
| Parathormon (pg/mL)                         |  | 351(261-628)    | 352(200-613)    | 352(200-613)    |
| ALT (U/L)                                   |  | 13(10-21)       | 11.25(8-17)     | 12(8-17)        |
| Albumin (g/dl)                              |  | 3.55(3-4)       | 3.76(3-4)       | 3.73(3-4)*      |

|                                 |  |                   |                 |                 |
|---------------------------------|--|-------------------|-----------------|-----------------|
| Ferritin (ng/ml)                |  | 782(465-1160)     | 563.4(326-872)  | 566(328-876)*   |
| CRP (mg/l)                      |  | 14(3-35)          | 6.6(2-17)       | 6.82(2-18)      |
| Hemoglobin (g/dl)               |  | 9.76(9-11)        | 10.6(10-12)     | 10.6(9-12)*     |
| Leukocyte(/mm <sup>3</sup> )    |  | 6720(4600-9280)   | 6250(4830-7810) | 6300(4815-7850) |
| Neutrophils (/mm <sup>3</sup> ) |  | 3476.5(2630-6350) | 3900(2700-5100) | 3880(2700-5130) |
| Lymphocytes (/mm <sup>3</sup> ) |  | 1070(700-1600)    | 1220(730-1700)  | 1220(730-1700)  |

Abbreviations: COPD: Chronic obstructive pulmonary disease, A-V: Arteriovenous, ACE: Angiotensin-converting enzyme inhibitors, ARB: Angiotensin receptor blockers, ESA: Erythropoiesis stimulating agents, IV: Intravenous, ICU: Intensive care unit, ECMO: Extracorporeal Membrane Oxygenation, HF: Hemofiltration, HDF: Hemodiafiltration, UF: Ultrafiltration, HD: hemodialysis, URR: Urea reduction ratio, ALT: Alanine Aminotransferase, CRP: C reactive protein, ADPKD: Autosomal dominant polycystic kidney disease

\*p<0.05

**Supplementary Table 3:** The comparative presentation demographics, comorbidities, laboratory tests, and outcomes of the patients stratified according to hospitalization.

|                                               |                              | Non-hospitalized<br>COVID-19 Group<br>N: 184 | Hospitalized<br>COVID-19 Group<br>N: 452 | Non-COVID group<br>N: 587 |
|-----------------------------------------------|------------------------------|----------------------------------------------|------------------------------------------|---------------------------|
| <b><u>Demographics</u></b>                    |                              |                                              |                                          |                           |
| Age (year), median (IQR)                      |                              | 55.5(43-66)                                  | 62(52-70) †                              | 60(47-69)                 |
| Gender, n(%)                                  | Women                        | 86(46.7)                                     | 206(45.6)                                | 239(40.7)                 |
|                                               | Men                          | 98(53.3)                                     | 246(54.4)                                | 348(59.3)                 |
| Duration of dialysis (years), median (IQR)    |                              | 48(24-96)                                    | 48(24-97)                                | 53(24-96)                 |
| Body mass index (kg/m <sup>2</sup> )          |                              | 25 (22-29)                                   | 25 (23-29)                               | 25 (22-28)                |
| Primary kidney disease, n(%)                  | Diabetic kidney disease      | 59(32.1)                                     | 171(37.8)*                               | 160(27.3)*                |
|                                               | Primary Glomerulonephritis   | 10(5.4)                                      | 29(6.4)                                  | 43(7.3)                   |
|                                               | Hypertensive nephrosclerosis | 49(26.6)*                                    | 161(35.6)                                | 216(36.8)*                |
|                                               | ADPKD                        | 9(4.9)                                       | 19(4.2)                                  | 31(5.3)                   |
|                                               | Other                        | 57(31.0)                                     | 72† (15.9)                               | 137(23.3)                 |
| <b>Comorbidities, n (%)</b>                   |                              |                                              |                                          |                           |
| Diabetes mellitus                             |                              | 70(38.5)                                     | 206(46.0)*                               | 196(33.6)*                |
| Hypertension                                  |                              | 133(73.1)                                    | 368(81.6)                                | 443(75.7)                 |
| COPD                                          |                              | 14(7.8)                                      | 64(14.4)                                 | 58(10.0)                  |
| Cardiac disease                               |                              | 58(32.2)                                     | 196(44.0)†                               | 213(36.7)                 |
| Cerebrovascular disease                       |                              | 5(2.8)                                       | 25(5.8)                                  | 24(4.1)                   |
| Malignancy                                    |                              | 6(3.4)                                       | 15(3.5)                                  | 18(3.1)                   |
| Chronic liver disease                         |                              | 6(3.4)                                       | 11(2.5)                                  | 21(3.6)                   |
| Autoimmune/autoinflammatory diseases          |                              | 4(2.2)                                       | 12(2.8)                                  | 24(4.2)                   |
| History of fistula thrombosis                 |                              | 18(10.2)                                     | 58(13.7)                                 | 59(10.2)                  |
| History of non-fistula thromboembolic disease |                              | 2(1.1)                                       | 13(3.1)                                  | 13(2.2)                   |
| <b>Medications, n (%)</b>                     |                              |                                              |                                          |                           |
| ACE inhibitor                                 |                              | 22(12.4) *                                   | 89(20.9)*                                | 118(20.4)                 |
| ARB                                           |                              | 11(6.2)                                      | 49(11.4)                                 | 47(8.2)                   |

|                                                    |                |                           |                           |                  |
|----------------------------------------------------|----------------|---------------------------|---------------------------|------------------|
| Calcium channel blockers                           |                | 69(38.5)                  | 208(48.0)                 | 236(41.2)        |
| Beta-blocker                                       |                | 75(41.9)                  | 204(47.6)                 | 237(41.1)        |
| Other antihypertensives                            |                | 41(23.4)                  | 81(19.0)                  | 136(23.7)        |
| Insulin                                            |                | 43(23.9)                  | 155(35.6) <sup>†</sup>    | 139(24.0)        |
| Oral antidiabetics                                 |                | 16(9.0)                   | 30(6.9)                   | 33(5.7)          |
| Statin                                             |                | 30(16.9)                  | 89(20.9)                  | 99(17.1)         |
| Antiaggregant                                      |                | 75(41.9) <sup>†</sup>     | 241(57.7)                 | 310(53.6)        |
| Anticoagulants                                     |                | 40(22.3)                  | 103(24.5)                 | 115(19.8)        |
| ESA                                                |                | 134(74.4)                 | 326(77.3)                 | 428(73.5)        |
| IV iron                                            |                | 110(61.1)                 | 269(63.7)                 | 374(64.5)        |
| Vitamin D or analogs                               |                | 88(48.9)                  | 238(56.3)                 | 338(57.9)        |
| Phosphorus binders containing calcium              |                | 121(67.2)                 | 309(73.0)                 | 396(67.9)        |
| Lanthanum                                          |                | 14(7.9)                   | 19(4.7)                   | 41(7.1)          |
| Cinacalcet                                         |                | 16(9.0) *                 | 68(16.9)*                 | 77(13.3)         |
| <b>Smoking, n(%)</b>                               | Never smoked   | 118(67.4) <sup>†</sup>    | 235(54.8)                 | 314(56.3)        |
|                                                    | Still smoking  | 25(14.3)                  | 45(10.5)                  | 80(14.3)         |
|                                                    | Quited smoking | 32(18.3) <sup>†</sup>     | 149(34.7)                 | 164(29.4)        |
| <b>Baseline (pre-COVID) lab data, median (IQR)</b> |                |                           |                           |                  |
| Potassium (mmol/L)                                 |                | 5(5-6)                    | 5(5-6)                    | 5(5-6)           |
| Calcium (mg/dl)                                    |                | 8.6(8-9)                  | 8.6(8-9)                  | 8.6(8-9)         |
| Phosphorus (mg/dl)                                 |                | 4.9(4-6)                  | 5(4-6)                    | 4.9(4-6)         |
| Parathormone (pg/mL)                               |                | 310(189-473) <sup>†</sup> | 382.5(239-652)            | 352(193-687)     |
| ALT (U/L)                                          |                | 11(8-16)                  | 12(8-18)                  | 11(7-16)         |
| Albumin (g/dl)                                     |                | 3.9(4-4) <sup>†</sup>     | 3.8(4-4)                  | 3.8(4-4)         |
| Ferritin (ng/ml)                                   |                | 520(252-799)              | 533(310-908) <sup>†</sup> | 492(278-764)     |
| CRP (mg/l)                                         |                | 6.9(3-16)                 | 8.7(3-23) <sup>†</sup>    | 4.0(2-11)        |
| Hemoglobin (g/dl)                                  |                | 11(10-12)                 | 10.9(10-12)               | 11(10-12)        |
| Leukocyte(/mm <sup>3</sup> )                       |                | 6500(5000-8400)           | 6400(5050-7900)*          | 6230(4800-7900)* |
| Number of neutrophils (/mm <sup>3</sup> )          |                | 3740(2380-5600)           | 3900(2700-5350)           | 3900(2670-5120)  |
| <b>Symptoms</b>                                    |                |                           |                           |                  |

|                                            |                                  |                |               |                |
|--------------------------------------------|----------------------------------|----------------|---------------|----------------|
| Fever                                      |                                  | 97(55.7)*      | 317(71.6)*    | NA             |
| Dyspnea                                    |                                  | 27(15.6)*      | 241(54.2)*    | NA             |
| Cough                                      |                                  | 80(46.0)*      | 311(70.0)*    | NA             |
| Diarrhea                                   |                                  | 13(7.6)*       | 75(17.3)*     | NA             |
| Loss of smell                              |                                  | 34(20.1)*      | 62(14.4)*     | NA             |
| Loss of taste                              |                                  | 35(20.7)*      | 76(17.7)*     | NA             |
| Presence of pneumonia at CT                |                                  | 66(48.2)*      | 365(85.5)*    | NA             |
| Clinical severity at the time of diagnosis | Asymptomatic disease             | 48(26.1)*      | 30(6.6)*      | NA             |
|                                            | Mild disease                     | 130(70.7)*     | 206(45.6)*    | NA             |
|                                            | Moderate-to-severe disease       | 6(3.3)*        | 196(43.4)*    | NA             |
|                                            | Serious-life threatening disease | 0(0.0)         | 20(4.4)*      | NA             |
| <b>Treatments for COVID-19, n(%)</b>       |                                  |                |               |                |
| Hydroxychloroquine                         |                                  | 27(16.6)*      | 107*(25.2)    | NA             |
| Oseltamivir                                |                                  | 2(1.2)*        | 31*(7.4)      | NA             |
| Macrolides                                 |                                  | 16(9.7)*       | 105*(25.2)    | NA             |
| Favipiravir                                |                                  | 152(89.4)      | 408(91.9)     | NA             |
| Glucocorticoids                            |                                  | 10(6.1)*       | 208*(49.2)    | NA             |
| Tocilizumab                                |                                  | 1(0.6)         | 7(1.7)        | NA             |
| Anakinra                                   |                                  | 01(0.0)        | 5(1.2)        | NA             |
| Convalescent Plasma                        |                                  | 01(0.0)        | 25(6.0)       | NA             |
| <b>28th-day lab data, median (IQR)</b>     |                                  |                |               |                |
| Creatinine (mg/dl)                         |                                  | 7.5(5.5-9.3)   | 7.0(5.6-8.5)* | 7.9(6.3-9.6) * |
| Potassium (mmol/L)                         |                                  | 4.8 (5-5)      | 5.0(4-5)*     | 5.1(5-6)*      |
| Calcium (mg/dl)                            |                                  | 8.5(8-9)       | 8.5(8-9)*     | 8.6(8-9)*      |
| Phosphorus (mg/dl)                         |                                  | 4.7(4-6)       | 4.9(4-6)      | 4.8(4-6)       |
| Parathormone (pg/mL)                       |                                  | 311(152-467) † | 351(224-654)  | 365(207-659)   |
| ALT (U/L)                                  |                                  | 11(8-16)       | 13(9-19)*     | 11(8-15)*      |
| Albumin (g/dl)                             |                                  | 3.82(3-4)      | 3.6(3-4) †    | 3.8(4-4)       |
| Ferritin (ng/ml)                           |                                  | 650(380-917)   | 653(350-1100) | 505(307-750) † |
| CRP (mg/l)                                 |                                  | 7.9(3-20)      | 11(4-28)*     | 3.4(2-12)*     |

|                                        |  |                 |                  |                  |
|----------------------------------------|--|-----------------|------------------|------------------|
| Hemoglobin (g/dl)                      |  | 10.4(10-12)*    | 10.0(9-11)*      | 11.0(10-12) †    |
| Leukocyte(/mm3)                        |  | 6230(4830-8000) | 6400(4970-7940)* | 6200(4600-7800)* |
| Number of neutrophils (/mm3)           |  | 3605(2040-5530) | 3970(2800-5300)  | 3910(2770-5040)  |
| <b>28th-day Outcomes, n(%)</b>         |  |                 |                  |                  |
| Non-survivor                           |  | 0(0)            | 19(4.2) †        | 0(0)             |
| Any respiratory symptom                |  | 14(7.6)*        | 138(30.5)*       | 11†(1.9)         |
| Rehospitalization for any reason       |  | 7(3.8)          | 45(10.0) †       | 24(4.1)          |
| Oxygen support at home                 |  | 2(1.1)          | 24(5.3) †        | 2(0.3)           |
| Lower respiratory infection            |  | 5(2.7)          | 60(13.3) †       | 8(1.4)           |
| Urinary tract infection                |  | 1(0.5)          | 2(0.4)           | 6(1.0)           |
| AV fistula thrombosis                  |  | 3(1.6)          | 12(2.7) †        | 4(0.7)           |
| Any other thromboembolic event         |  | 3(1.6)          | 10(2.2) †        | 2(0.3)           |
| <b>90th-day lab data, median (IQR)</b> |  |                 |                  |                  |
| Creatinine (mg/dl)                     |  | 7.3(5.9-9.2)*   | 7.1(5.7-8.7)     | 7.9(6.3-9.5)*    |
| Potassium (mmol/L)                     |  | 5(4.4-5.5)      | 5(4.6-5.5)       | 5(4.6-5.6)       |
| Calcium (mg/dl)                        |  | 8.7(8.2-9.2)    | 8.7(8.1-9.1)     | 8.6(8.1-9.1)     |
| Phosphorus (mg/dl)                     |  | 4.6(3.7-5.7)*   | 5.055(4.2-6.0)*  | 4.97(4.0-5.9)    |
| Parathormone (pg/mL)                   |  | 302(166-449)    | 350(177-590)     | 388(215-651)     |
| ALT (U/L)                              |  | 10(6.0-16.0)    | 12(8.0-17.0)     | 10(7.6-15.0)     |
| Albumin (g/dl)                         |  | 3.9(3.6-4.1)    | 3.8(3.5-4.0)     | 3.8(3.6-4.0)     |
| Ferritin (ng/ml)                       |  | 481(305-750)    | 551(279-931)*    | 476(292-762)*    |
| CRP (mg/l)                             |  | 5.7(3.0-11.9)   | 7.78(3.1-17.8)*  | 4.0(1.8-11.9)*   |
| Hemoglobin (g/dl)                      |  | 11.0(10.2-11.9) | 11.0(10.0-11.9)  | 11.2(10.2-12.0)  |
| Leukocyte(/mm3)                        |  | 6400(5370-8000) | 6430(5000-8030)* | 6335(4840-7715)* |
| Number of neutrophils (/mm3)           |  | 3715(2507-5180) | 3900(2800-5110)  | 3900(2790-4950)  |
| <b>90th-day Outcomes, n(%)</b>         |  |                 |                  |                  |
| Non-survivor                           |  | 2(1.1)          | 32(7.1) †        | 4(0.7)           |
| Any respiratory symptom                |  | 5(2.7)          | 44(9.7) †        | 10(1.7)          |
| Rehospitalization for any reason       |  | 12(6.5)         | 35(7.7) *        | 18(3.1)*         |

|                                |  |         |           |          |
|--------------------------------|--|---------|-----------|----------|
| Oxygen support at home         |  | 2(1.1)  | 11(2.4) * | 2(0.3) * |
| Lower respiratory infection    |  | 1(0.5)  | 19(4.2) † | 4(0.7)   |
| Urinary tract infection        |  | 3(1.6)  | 4(0.9)    | 7(1.2)   |
| AV fistula thrombosis          |  | 4(2.2)* | 5(1.1)    | 2(0.3)*  |
| Any other thromboembolic event |  | 4(2.2)* | 5(1.1)    | 1(0.2)*  |

**Abbreviations:** HD: hemodialysis, COPD: Chronic obstructive pulmonary disease, ADPKD: Autosomal dominant polycystic kidney disease, ESA: Erythropoietin-Stimulating Agents, IV: intravenous, ALT: Alanine Aminotransferase, CRP: C reactive protein, NA: Not applicable

\* the difference between these groups is statistically significant ( $p < 0.05$ ) in this row

† this group is statistically significantly different from the other groups ( $p < 0.05$ ) in this row

**Supplementary Table 4:** Binary logistic regression analysis of the baseline parameters related to the 90th-day mortality. COVID-19 group was divided into two groups according to hospitalization.

|                                                       | OR    | 95% CI for OR |        | P     |
|-------------------------------------------------------|-------|---------------|--------|-------|
|                                                       |       | Lower         | Upper  |       |
| <b>Age (years)</b>                                    | 1.022 | 0.988         | 1.056  | 0.205 |
| <b>Gender (male/female)</b>                           | 0.880 | 0.385         | 2.012  | 0.762 |
| <b>Diabetes mellitus</b>                              | 1.089 | 0.460         | 2.578  | 0.846 |
| <b>Cardiac disease</b>                                | 1.022 | 0.430         | 2.426  | 0.961 |
| <b>Group (Non-COVID group: reference)</b>             |       |               |        | 0.001 |
| <b>Outpatient COVID-19 group</b>                      | 0.969 | 0.099         | 9.487  | 0.979 |
| <b>Hospitalized COVID-19 group</b>                    | 7.854 | 1.032         | 59.757 | 0.047 |
| <b>Vascular access (Tunneled catheter/AV fistula)</b> | 3.522 | 1.496         | 8.292  | 0.004 |
| <b>Albumin (g/dl)</b>                                 | 0.772 | 0.396         | 1.504  | 0.446 |
| <b>CRP (mg/l)</b>                                     | 1.002 | 0.993         | 1.012  | 0.601 |
| <b>Constant</b>                                       | 0.013 |               |        | 0.020 |

**Abbreviations:** OR: Odds ratio, CI: Confidence interval, AV: arteriovenous

The model included the parameters that were found different between groups in supplementary Table 3. We also added gender and diabetes mellitus, which might be effective in survival based on the literature.



STROBE Statement—checklist of items that should be included in reports of observational studies

|                              | Item No | Recommendation                                                                                                                                                                                                                                                                                                                                                                                                                                                                                                                                                                                                                                                                                                         |
|------------------------------|---------|------------------------------------------------------------------------------------------------------------------------------------------------------------------------------------------------------------------------------------------------------------------------------------------------------------------------------------------------------------------------------------------------------------------------------------------------------------------------------------------------------------------------------------------------------------------------------------------------------------------------------------------------------------------------------------------------------------------------|
| <b>Title and abstract</b>    | 1       | (a) Indicate the study’s design with a commonly used term in the title or the abstract <b>YES</b><br>(b) Provide in the abstract an informative and balanced summary of what was done and what was found <b>YES</b>                                                                                                                                                                                                                                                                                                                                                                                                                                                                                                    |
| <b>Introduction</b>          |         |                                                                                                                                                                                                                                                                                                                                                                                                                                                                                                                                                                                                                                                                                                                        |
| Background/rationale         | 2       | Explain the scientific background and rationale for the investigation being reported <b>YES</b>                                                                                                                                                                                                                                                                                                                                                                                                                                                                                                                                                                                                                        |
| Objectives                   | 3       | State specific objectives, including any prespecified hypotheses <b>YES</b>                                                                                                                                                                                                                                                                                                                                                                                                                                                                                                                                                                                                                                            |
| <b>Methods</b>               |         |                                                                                                                                                                                                                                                                                                                                                                                                                                                                                                                                                                                                                                                                                                                        |
| Study design                 | 4       | Present key elements of study design early in the paper <b>YES</b>                                                                                                                                                                                                                                                                                                                                                                                                                                                                                                                                                                                                                                                     |
| Setting                      | 5       | Describe the setting, locations, and relevant dates, including periods of recruitment, exposure, follow-up, and data collection <b>YES</b>                                                                                                                                                                                                                                                                                                                                                                                                                                                                                                                                                                             |
| Participants                 | 6       | (a) <i>Cohort study</i> —Give the eligibility criteria, and the sources and methods of selection of participants. Describe methods of follow-up <b>YES</b><br><i>Case-control study</i> —Give the eligibility criteria, and the sources and methods of case ascertainment and control selection. Give the rationale for the choice of cases and controls<br><i>Cross-sectional study</i> —Give the eligibility criteria, and the sources and methods of selection of participants<br>(b) <i>Cohort study</i> —For matched studies, give matching criteria and number of exposed and unexposed <b>YES</b><br><i>Case-control study</i> —For matched studies, give matching criteria and the number of controls per case |
| Variables                    | 7       | Clearly define all outcomes, exposures, predictors, potential confounders, and effect modifiers. Give diagnostic criteria, if applicable <b>YES</b>                                                                                                                                                                                                                                                                                                                                                                                                                                                                                                                                                                    |
| Data sources/<br>measurement | 8*      | For each variable of interest, give sources of data and details of methods of assessment (measurement). Describe comparability of assessment methods if there is more than one group <b>YES</b>                                                                                                                                                                                                                                                                                                                                                                                                                                                                                                                        |
| Bias                         | 9       | Describe any efforts to address potential sources of bias <b>YES</b>                                                                                                                                                                                                                                                                                                                                                                                                                                                                                                                                                                                                                                                   |
| Study size                   | 10      | Explain how the study size was arrived at <b>YES</b>                                                                                                                                                                                                                                                                                                                                                                                                                                                                                                                                                                                                                                                                   |
| Quantitative variables       | 11      | Explain how quantitative variables were handled in the analyses. If applicable, describe which groupings were chosen and why <b>YES</b>                                                                                                                                                                                                                                                                                                                                                                                                                                                                                                                                                                                |
| Statistical methods          | 12      | (a) Describe all statistical methods, including those used to control for confounding <b>YES</b><br>(b) Describe any methods used to examine subgroups and interactions <b>YES</b><br>(c) Explain how missing data were addressed <b>YES</b><br>(d) <i>Cohort study</i> —If applicable, explain how loss to follow-up was addressed<br><i>Case-control study</i> —If applicable, explain how matching of cases and controls was addressed                                                                                                                                                                                                                                                                              |

*Cross-sectional study*—If applicable, describe analytical methods taking account of sampling strategy

(e) Describe any sensitivity analyses

## Results

|                  |     |                                                                                                                                                                                                                                                                                                                                                                                                                          |
|------------------|-----|--------------------------------------------------------------------------------------------------------------------------------------------------------------------------------------------------------------------------------------------------------------------------------------------------------------------------------------------------------------------------------------------------------------------------|
| Participants     | 13* | (a) Report numbers of individuals at each stage of study—eg numbers potentially eligible, examined for eligibility, confirmed eligible, included in the study, completing follow-up, and analysed <b>YES</b><br>(b) Give reasons for non-participation at each stage <b>YES</b><br>(c) Consider use of a flow diagram                                                                                                    |
| Descriptive data | 14* | (a) Give characteristics of study participants (eg demographic, clinical, social) and information on exposures and potential confounders <b>YES</b><br>(b) Indicate number of participants with missing data for each variable of interest <b>YES</b><br>(c) <i>Cohort study</i> —Summarise follow-up time (eg, average and total amount) <b>YES</b>                                                                     |
| Outcome data     | 15* | <i>Cohort study</i> —Report numbers of outcome events or summary measures over time <b>YES</b><br><i>Case-control study</i> —Report numbers in each exposure category, or summary measures of exposure<br><i>Cross-sectional study</i> —Report numbers of outcome events or summary measures                                                                                                                             |
| Main results     | 16  | (a) Give unadjusted estimates and, if applicable, confounder-adjusted estimates and their precision (eg, 95% confidence interval). Make clear which confounders were adjusted for and why they were included <b>YES</b><br>(b) Report category boundaries when continuous variables were categorized<br>(c) If relevant, consider translating estimates of relative risk into absolute risk for a meaningful time period |
| Other analyses   | 17  | Report other analyses done—eg analyses of subgroups and interactions, and sensitivity analyses <b>YES</b>                                                                                                                                                                                                                                                                                                                |

## Discussion

|                  |    |                                                                                                                                                                                       |
|------------------|----|---------------------------------------------------------------------------------------------------------------------------------------------------------------------------------------|
| Key results      | 18 | Summarise key results with reference to study objectives <b>YES</b>                                                                                                                   |
| Limitations      | 19 | Discuss limitations of the study, taking into account sources of potential bias or imprecision. Discuss both direction and magnitude of any potential bias <b>YES</b>                 |
| Interpretation   | 20 | Give a cautious overall interpretation of results considering objectives, limitations, multiplicity of analyses, results from similar studies, and other relevant evidence <b>YES</b> |
| Generalisability | 21 | Discuss the generalisability (external validity) of the study results <b>YES</b>                                                                                                      |

## Other information

|         |    |                                                                                                                                                                          |
|---------|----|--------------------------------------------------------------------------------------------------------------------------------------------------------------------------|
| Funding | 22 | Give the source of funding and the role of the funders for the present study and, if applicable, for the original study on which the present article is based <b>YES</b> |
|---------|----|--------------------------------------------------------------------------------------------------------------------------------------------------------------------------|

\*Give information separately for cases and controls in case-control studies and, if applicable, for exposed and unexposed groups in cohort and cross-sectional studies.

**Note:** An Explanation and Elaboration article discusses each checklist item and gives methodological background and published examples of transparent reporting. The STROBE checklist is best used in conjunction

with this article (freely available on the Web sites of PLoS Medicine at <http://www.plosmedicine.org/>, Annals of Internal Medicine at <http://www.annals.org/>, and Epidemiology at <http://www.epidem.com/>). Information on the STROBE Initiative is available at [www.strobe-statement.org](http://www.strobe-statement.org).

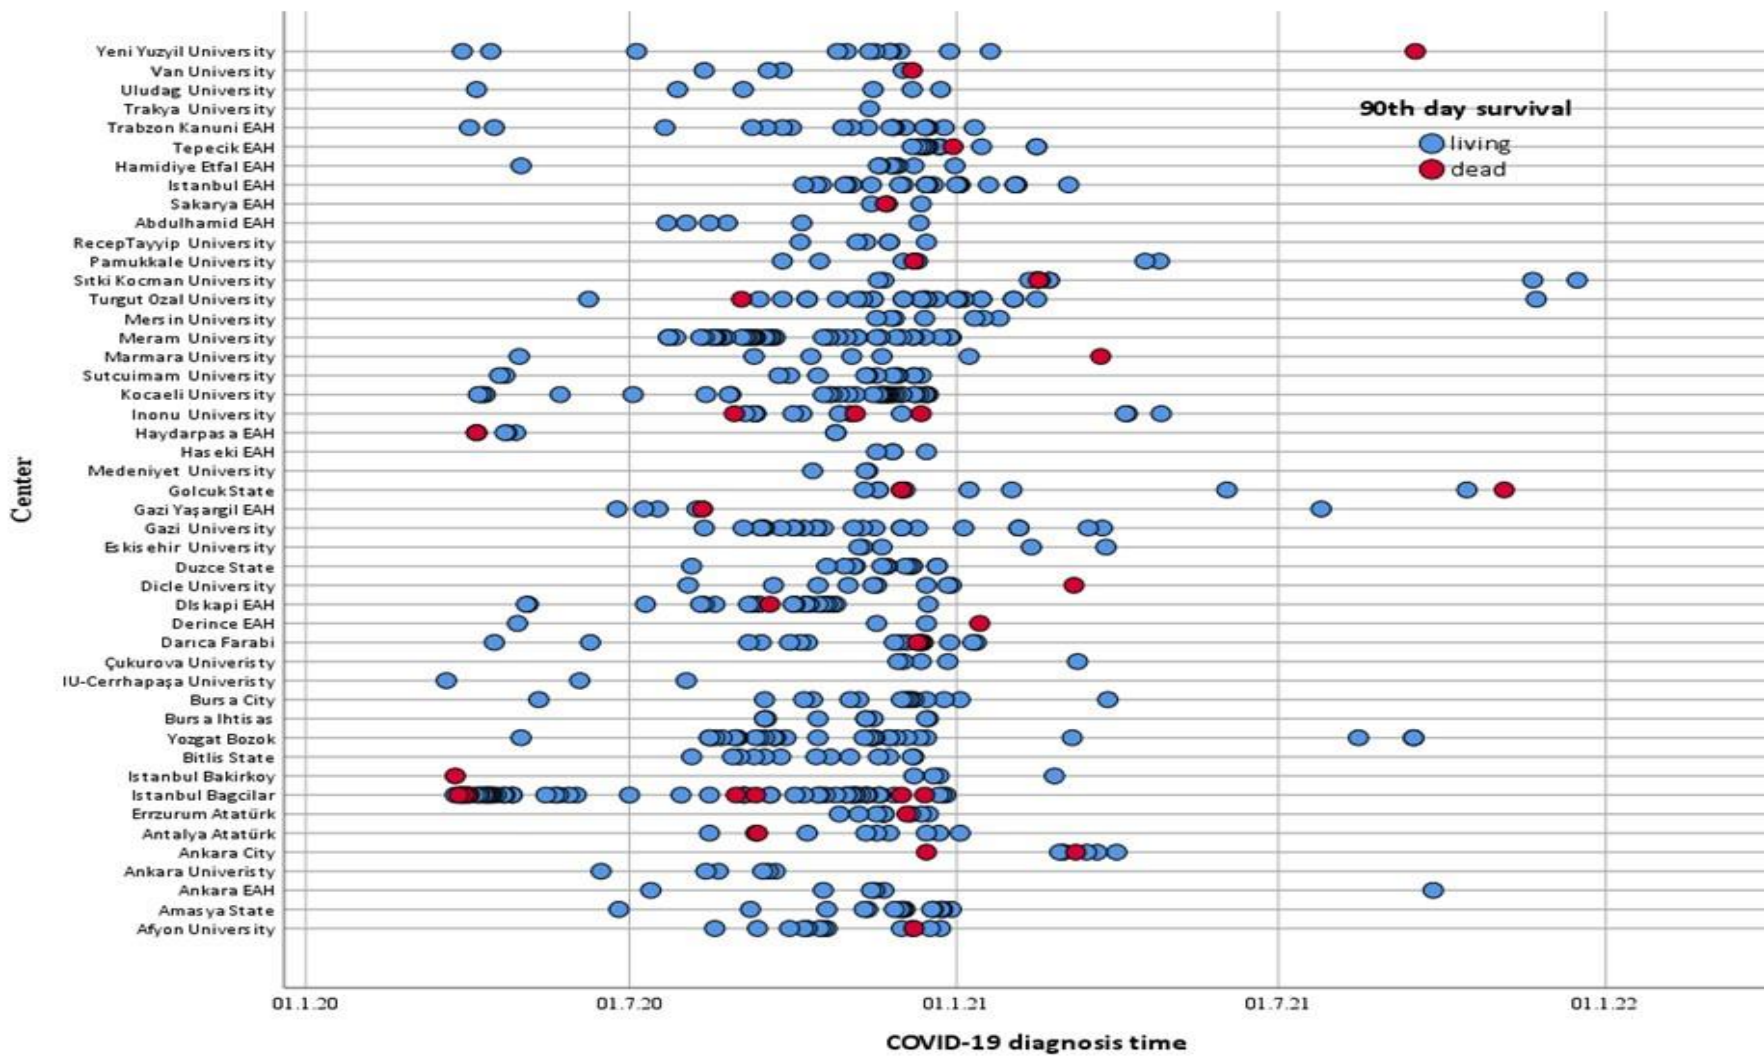

Supplementary Figure 1
